# Supplementary material for: Expression of circadian clock genes and proteins in urothelial cancer is related to cancer-associated genes
Source: PubMed Central journal article supplement (PMC4964027; doi:10.1186/s12885-016-2580-y), 2016-07-27

## **Additional files**

### **Additional file 1; Legend to illustration:**

**Figure S1.** Immunohistochemical staining of various clock proteins in urothelial cancer as compared to normal controls stained in parallel. Counterstained with hematoxylin (blue nuclei). Magnification is given by the tool bar: 10 $\mu$ m. A: Per1 in tumour showing the same staining density as in controls (B). C: Per3 with positive nuclei in tumour as compared to negative in the controls (D). The cytoplasm is slightly positive in both. E: Cry1 with increased positivity in tumour cell cytoplasm as compared to the control (F). G: Cry2 with negative reaction in tumour cell nuclei and positive in controls (H). I: Bmal-1 with approximately equal staining in tumour cells and control (J), i.e. moderate staining in nuclei and strong in cytoplasm. For semi quantitative estimates and details, see Table 3.

**Figure S1**

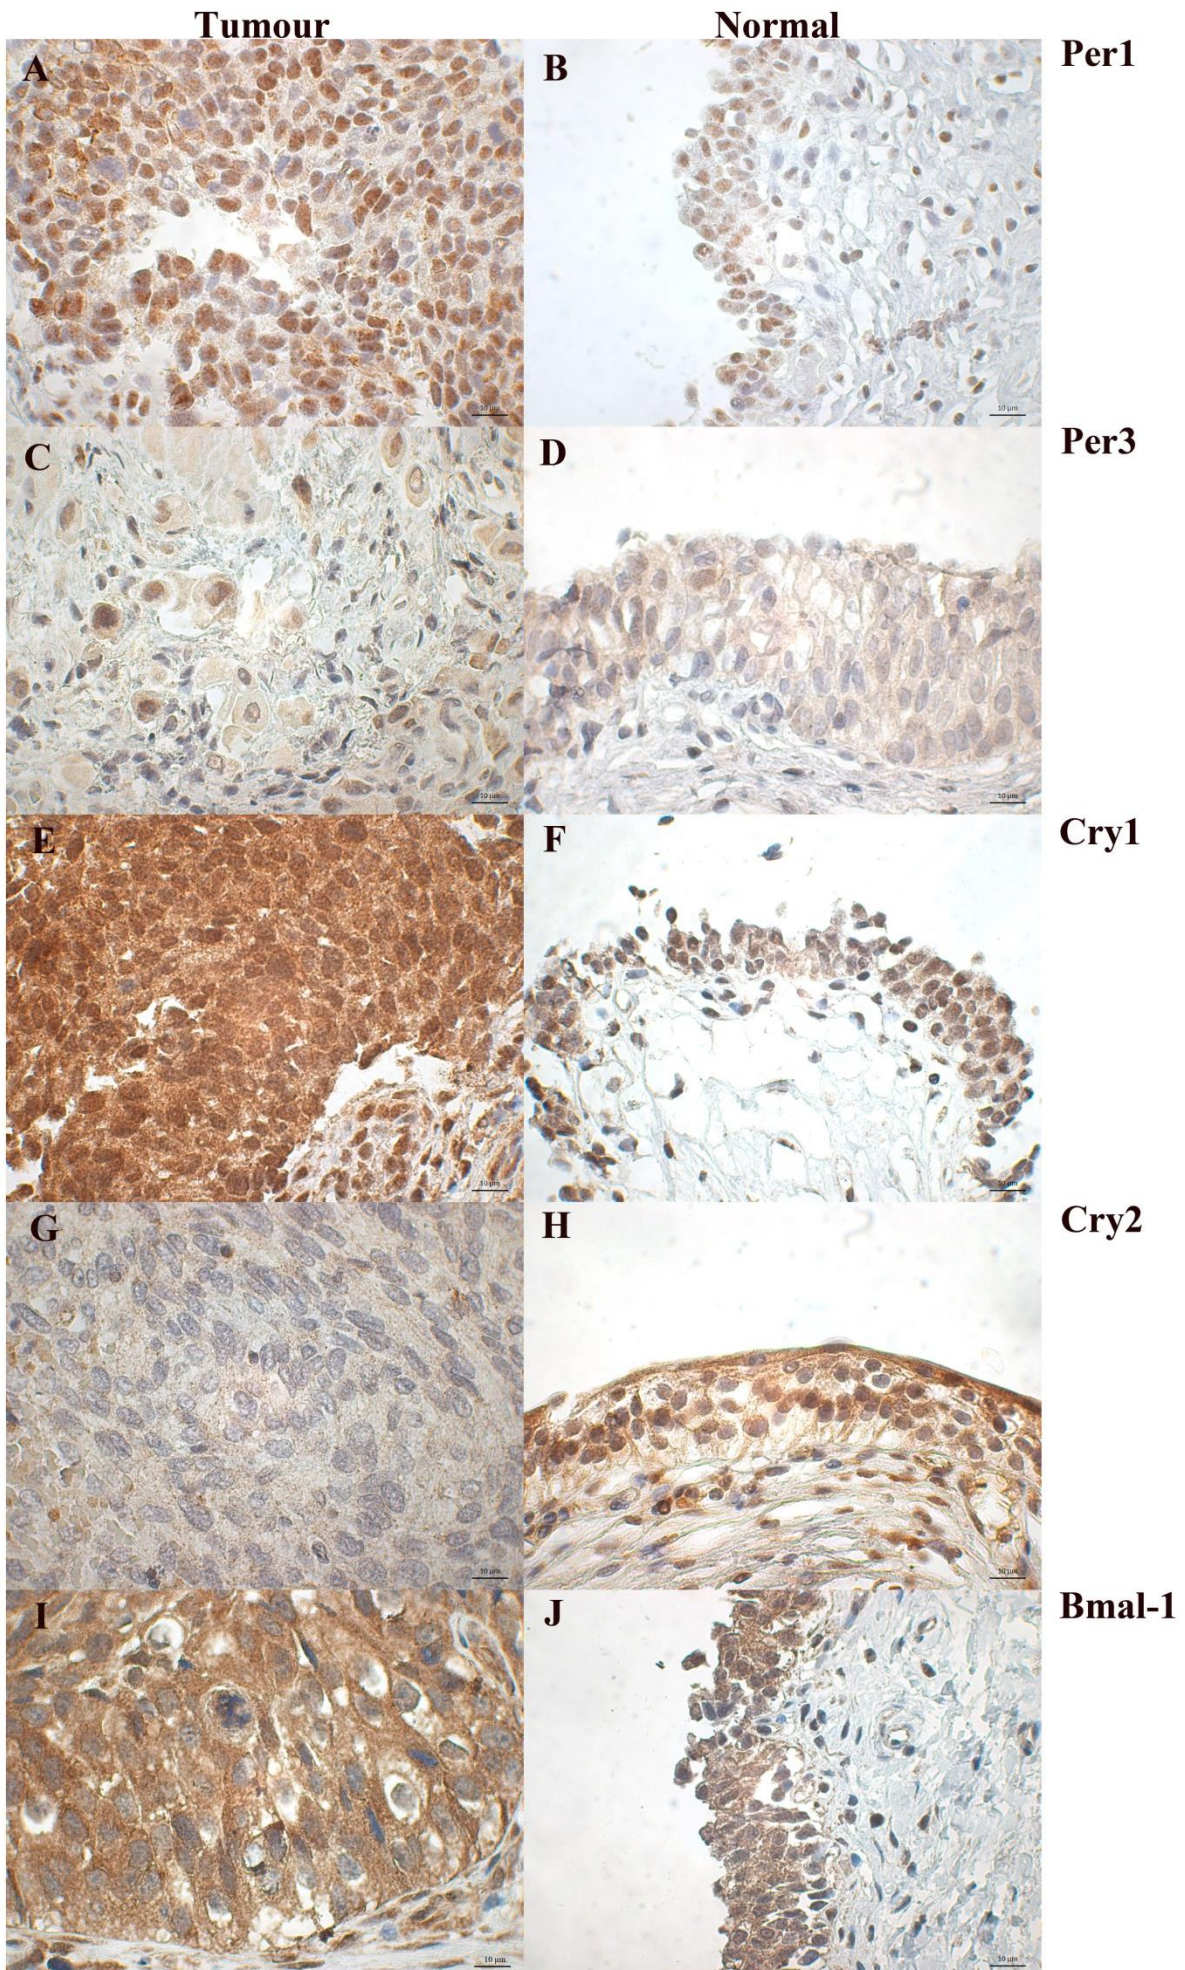

Supplement: 12885_2016_2580_MOESM1_ESM.pdf [file 12885_2016_2580_MOESM1_ESM.pdf]
